# Supplementary material
Source: PubMed Central journal article supplement (PMC10389258)
Supplement: NIHMS1798900-supplement-Table_S2__adhesion_parameters_.pdf [file NIHMS1798900-supplement-Table_S2__adhesion_parameters_.pdf]

|                           | Induced<br><b>Hi.Ecad</b> | Basal<br><b>Hi.Ecad</b> | Induced<br><b>Ecad</b> | Basal<br><b>Ecad</b> | Induced<br><b>Lo.Ecad</b> | Basal<br><b>Lo.Ecad</b> |
|---------------------------|---------------------------|-------------------------|------------------------|----------------------|---------------------------|-------------------------|
| Induced<br><b>Hi.Ecad</b> | 20                        | 40                      |                        |                      | 35                        | 49                      |
| Basal <b>Hi.Ecad</b>      |                           | 45                      |                        |                      | 40                        | 49                      |
| Induced <b>Ecad</b>       |                           |                         | 25                     | 42                   |                           |                         |
| Basal <b>Ecad</b>         |                           |                         |                        | 47                   |                           |                         |
| Induced<br><b>Lo.Ecad</b> |                           |                         |                        |                      | 40                        | 49                      |
| Basal <b>Lo.Ecad</b>      |                           |                         |                        |                      |                           | 49                      |

|                     | Induced<br><b>Ncad</b> | Basal<br><b>Ncad</b> | Induced<br><b>Pcad</b> | Basal <b>Pcad</b> | <b>C.Pcad</b> |
|---------------------|------------------------|----------------------|------------------------|-------------------|---------------|
| Induced <b>Ncad</b> | 35                     | 42                   | 49                     | 49                | 49            |
| Basal <b>Ncad</b>   |                        | 47                   | 49                     | 49                | 49            |
| Induced <b>Pcad</b> |                        |                      | 35                     | 42                |               |
| Basal <b>Pcad</b>   |                        |                      |                        | 47                |               |
| <b>C.Pcad</b>       |                        |                      |                        |                   | 43            |
